# Supplementary material for: Temporal Proteomic Analysis of BK Polyomavirus Infection Reveals Virus-Induced G2 Arrest and Highly Effective Evasion of Innate Immune Sensing
Source: PubMed Central journal article supplement (PMC6675895; doi:10.1128/jvi.00595-19), 2019-07-30
Supplement: JVI.00595-19-s0005.pdf [file JVI.00595-19-s0005.pdf]

1 **Supplementary Data Table descriptions**

2 **Table S1.** Interactive spreadsheet of all mass spectrometry data. The “DATA” worksheet shows  
3 minimally annotated protein data, with only formatting and normalisation modifying the raw data.  
4 The “Plotter” worksheet enables generation of individual protein abundance changes for both viral  
5 and human proteins over time from experiments 1 and 2. The total number of quantified peptides  
6 and proteins from experiments 1 and 2 are shown in separate workbook sheets.

7 **Table S2.** A list of all quantified proteins from experiments 1 and 2 that match the UniProt keywords  
8 terms ‘Innate Immunity’ and ‘Antiviral Defense’ and their corresponding fold changes post-BKPyV  
9 infection.

10 **Table S3.** Proteins modulated during BK infection. All proteins downregulated or upregulated >2-  
11 fold at any time point during the course of infection (compared to the average of the mock samples).  
12 Results from experiments 1 and 2 are presented.

13 **Table S4.** DAVID functional enrichment analysis from proteins upregulated or downregulated >2-  
14 fold against a background of all proteins quantified. Only significant (Benjamini-Hochberg  
15 corrected) clusters from experiments 1 and 2 are shown. There were no significant clusters amongst  
16 proteins downregulated >2-fold in experiment 2.

17
